# Supplementary material for: A Comparative Transcriptome Analysis of Human and Porcine Choroid Plexus Cells in Response to Streptococcus suis Serotype 2 Infection Points to a Role of Hypoxia
Source: PubMed Central journal article supplement (PMC7982935; doi:10.3389/fcimb.2021.639620), 2021-03-08
Supplement: DataSheet_1.pdf [file DataSheet_1.pdf]

**Supplementary Table S1.** Oligonucleotide primers used for the RT-PCR.

| Gene           | Oligonucleotide primer for RT-PCR     | Annealing Temp. (°C) | Amplicon size (bp) | Reference               |
|----------------|---------------------------------------|----------------------|--------------------|-------------------------|
| <b>Human</b>   |                                       |                      |                    |                         |
| <i>gapdh</i>   | Forward 5'-TGTTGCCATCAATGACCCCTT-3'   | 60                   | 202                | Borkowski et al. (2014) |
|                | Reverse 5'-CTCCACGACGTACTIONCAGCG-3'  |                      |                    |                         |
| <i>nfkbi</i>   | Forward 5'-CAGTTCAAGTTAGCTGGCTGA-3'   | 60                   | 177                | Borkowski et al. (2014) |
|                | Reverse 5'-TCTGTGGAGAATACTGGTACAGG-3' |                      |                    |                         |
| <i>il8</i>     | Forward 5'-CAAGAGCCAGGAAGAAACCA-3'    | 60                   | 225                | Borkowski et al. (2014) |
|                | Reverse 5'-GTCCACTCTCAATCACTCTCAG-3'  |                      |                    |                         |
| <i>tnf-α</i>   | Forward 5'-GAGCACTGAAAGCATGATCC-3'    | 60                   | 234                | Borkowski et al. (2014) |
|                | Reverse 5'-CGAGAAGATGATCTGACTGCC-3'   |                      |                    |                         |
| <i>cxcl1</i>   | Forward 5'-CTCTCCGCTCCTCTCACAG-3'     | 60                   | 239                | van Sorge et al. (2008) |
|                | Reverse 5'-GGGGACTTCACGTTCACT-3'      |                      |                    |                         |
| <i>cxcl2</i>   | Forward 5'-CTCAAGAATGGGCAGAAAGC-3'    | 60                   | 213                | van Sorge et al. (2008) |
|                | Reverse 5'-AAACACATTAGGCGCAATCC-3'    |                      |                    |                         |
| <b>Porcine</b> |                                       |                      |                    |                         |
| <i>gapdh</i>   | Forward 5'-CAGCCTCAAGATCATCAGCA-3'    | 55                   | 594                | Tenenbaum et al. (2008) |
|                | Reverse 5'-TCCAGGGGCTTACTCCTT-3'      |                      |                    |                         |
| <i>il8</i>     | Forward 5'-GATGCCAACACAACCTCAATCA-3'  | 60                   | 221                | This study              |
|                | Reverse 5'-GCCAAAACAGGATTTCCAGC-3'    |                      |                    |                         |
| <i>il1β</i>    | Forward 5'-ATGCCAACGTGCAGTCTATG-3'    | 55                   | 400                | This study              |
|                | Reverse 5'-GAAGACGGGCTTTTGTCTG-3'     |                      |                    |                         |
| <i>cxcl2</i>   | Forward 5'-ACTGCTCTTGTTAGCATCTTCTC-3' | 55                   | 109                | This study              |
|                | Reverse 5'-TGACCAAACGGAAGTCATAGC-3'   |                      |                    |                         |

bp, base pairs; *cxcl*, (C-X-C motif) ligand; *gapdh*, glyceraldehyde-3-phosphate dehydrogenase; *il*, interleukin; *nfkbi*, NF-kappa-B inhibitor zeta; *tnf-α*, tumor necrosis factor alpha

## References

- Borkowski, J., Li, L., Steinmann, U., Quednau, N., Stump-Guthier, C., Weiss, C., Findeisen, P., Gretz, N., Ishikawa, H., Tenenbaum, T., *et al.* (2014). Neisseria meningitidis elicits a pro-inflammatory response involving IkappaBzeta in a human blood-cerebrospinal fluid barrier model. *J. Neuroinflammation* 11, 163.
- Tenenbaum, T., Matalon, D., Adam, R., Seibt, A., Wewer, C., Schwerk, C., Galla, H.J., and Schrotten, H. (2008). Dexamethasone prevents alteration of tight junction-associated proteins and barrier function in porcine choroid plexus epithelial cells after infection with *Streptococcus suis* in vitro. *Brain Res.* 1229, 1-17.
- van Sorge, N.M., Ebrahimi, C.M., McGillivray, S.M., Quach, D., Sabet, M., Guiney, D.G., and Doran, K.S. (2008). Anthrax toxins inhibit neutrophil signaling pathways in brain endothelium and contribute to the pathogenesis of meningitis. *PLoS One* 3, e2964.

**Supplementary Table S2.** Oligonucleotide primers used for the QPCR.

| Gene           | Oligonucleotide primer for QPCR        | Annealing Temp. (°C) | Amplicon size (bp) | Reference                |
|----------------|----------------------------------------|----------------------|--------------------|--------------------------|
| <b>Human</b>   |                                        |                      |                    |                          |
| <i>gapdh</i>   | Forward 5'-TGTTGCCATCAATGACCCCTT-3'    | 60                   | 202                | (Borkowski et al., 2014) |
|                | Reverse 5'-CTCCACGACGTA CT CAGCG-3'    |                      |                    |                          |
| <i>il1β</i>    | Forward 5'-AGCTACGAATCTCCGACCAC-3'     | 60                   | 186                | This study               |
|                | Reverse 5'-CGTTATCCCATGTGTCCAAGAA-3'   |                      |                    |                          |
| <i>il8</i>     | Forward 5'-CAAGAGCCAGGAAGAAACCA-3'     | 60                   | 225                | (Borkowski et al., 2014) |
|                | Reverse 5'-GTCCACTCTCAATCACTCTCAG-3'   |                      |                    |                          |
| <i>cxcl2</i>   | Forward 5'-CTCAAGAATGGGCAGAAAGC-3'     | 60                   | 213                | (van Sorge et al., 2008) |
|                | Reverse 5'-AAACACATTAGGCGCAATCC-3'     |                      |                    |                          |
| <i>tnf-α</i>   | Forward 5'-GAGCACTGAAAGCATGATCC-3'     | 60                   | 234                | (Borkowski et al., 2014) |
|                | Reverse 5'-CGAGAAGATGATCTGACTGCC-3'    |                      |                    |                          |
| <i>nfkbia</i>  | Forward 5'-CTCCGAGACTTTTCGAGGAAATAC-3' | 60                   | 135                | This study               |
|                | Reverse 5'-GCCATTGTAGTTGGTAGCCTTCA-3'  |                      |                    |                          |
| <i>zc3h12a</i> | Forward 5'-GGCAGTGAAGTGGTTTCTGGA-3'    | 60                   | 232                | (Borkowski et al., 2014) |
|                | Reverse 5'-GATCCCGTCAGACTCGTAGG-3'     |                      |                    |                          |
| <i>tcim</i>    | Forward 5'-AGAAGAGCCTGGACAGATGT-3'     | 58                   | 175                | This study               |
|                | Reverse 5'-TTTTCTCTCCCTGTCCTCCC-3'     |                      |                    |                          |
| <i>hif1α</i>   | Forward 5'-GAACCCATTCCCTCACCCATC-3'    | 58                   | 250                | This study               |
|                | Reverse 5'-GCATCCTGTACTGTCCTGTG-3'     |                      |                    |                          |
| <i>vegfa</i>   | Forward 5'-TCTTCAAGCCATCCTGTGTG-3'     | 58                   | 235                | This study               |
|                | Reverse 5'-CCCTTCCCTTCCCTCGAAC-3'      |                      |                    |                          |
| <i>mx1</i>     | Forward 5'-CTCTCTTCCCTCACAGTCCCA-3'    | 58                   | 194                | This study               |
|                | Reverse 5'-CAGGGGTAAGGTCTCCAAGA-3'     |                      |                    |                          |
| <i>dusp2</i>   | Forward 5'-ATCTTGCCCTACCTGTTCT-3'      | 58                   | 222                | This study               |
|                | Reverse 5'-GCTGTTCTTCAACCCAGTCAA-3'    |                      |                    |                          |
| <b>Porcine</b> |                                        |                      |                    |                          |
| <i>Gapdh</i>   | Forward 5'-TGGTGCTACGTATGTTGTGG-3'     | 58                   | 177                | This study               |
|                | Reverse 5'-ATTGCTGACGATCTTGAGGG-3'     |                      |                    |                          |
| <i>il1β</i>    | Forward 5'-GAGTGCAAACCTCCAGGACAA-3'    | 58                   | 218                | This study               |
|                | Reverse 5'-GGTGGCGTGTTATCTTTCA-3'      |                      |                    |                          |
| <i>il8</i>     | Forward 5'-GATGCCAACACAACCTCAATCA-3'   | 60                   | 221                | This study               |
|                | Reverse 5'-GCCAAAACAGGATTTCCAGC-3'     |                      |                    |                          |
| <i>cxcl2</i>   | Forward 5'-ACTGCTCTTGTAGCATCTTCTC-3'   | 55                   | 109                | This study               |
|                | Reverse 5'-TGACCAAACGGAAGTCATAGC-3'    |                      |                    |                          |
| <i>tnfa</i>    | Forward 5'-ACGTTTTCTCACTCACACC-3'      | 58                   | 176                | This study               |
|                | Reverse 5'-TCGATCATCCTTCTCCAGCT-3'     |                      |                    |                          |
| <i>nfkbia</i>  | Forward 5'-TGTCGCTCTTGTGAAGTGT-3'      | 58                   | 193                | This study               |
|                | Reverse 5'-TCTGTGAACTCTGACTCCGT-3'     |                      |                    |                          |
| <i>zc3h12a</i> | Forward 5'-CTGTAGGATTGGTTCTGGCC-3'     | 58                   | 156                | This study               |
|                | Reverse 5'-CGAGAGAAAGGAGGGTTTGG-3'     |                      |                    |                          |
| <i>tcim</i>    | Forward 5'-CCGATCAACTTCACGTCTGT-3'     | 58                   | 181                | This study               |
|                | Reverse 5'-CTGCAATTCTTCTCCAGCCT-3'     |                      |                    |                          |
| <i>hif1α</i>   | Forward 5'-TGTAATGCTCCCCTCATCCA-3'     | 58                   | 198                | This study               |
|                | Reverse 5'-GGCTGATCTTGAATCTGGGG-3'     |                      |                    |                          |
| <i>vegfa</i>   | Forward 5'-CGAGTACATCTTCAAGCCGT-3'     | 58                   | 154                | This study               |
|                | Reverse 5'-CATCTCCTATGTGCTGGC-3'       |                      |                    |                          |
| <i>mx1</i>     | Forward 5'-GCAGAGTATTGGGAGTGACG-3'     | 58                   | 155                | This study               |
|                | Reverse 5'-GAGACTGCAACATGAACCCA-3'     |                      |                    |                          |
| <i>dusp2</i>   | Forward 5'-CAGATGGTGGAGATCAGTGC-3'     | 58                   | 228                | This study               |
|                | Reverse 5'-CTGCCCATGAAACTGAAGT-3'      |                      |                    |                          |

*dusp2*, dual specificity phosphatase 2; *hif1α*, hypoxia-inducible factor 1 alpha; *mx1*, MAX interactor 1; *nfkbia*, NFκB inhibitor alpha; *tcim*, transcriptional and immune response regulator; *vegfa*, vascular endothelial growth factor alpha; *zc3h12a*, zinc finger CCCH-type containing 12A

## References

Borkowski, J., Li, L., Steinmann, U., Quednau, N., Stump-Guthier, C., Weiss, C., Findeisen, P., Gretz, N., Ishikawa, H., Tenenbaum, T., *et al.* (2014). *Neisseria meningitidis* elicits a pro-inflammatory response involving I kappa B zeta in a human blood-cerebrospinal fluid barrier model. *J. Neuroinflamm* 11, 163.

van Sorge, N.M., Ebrahimi, C.M., McGillivray, S.M., Quach, D., Sabet, M., Guiney, D.G., and Doran, K.S. (2008). Anthrax toxins inhibit neutrophil signaling pathways in brain endothelium and contribute to the pathogenesis of meningitis. *PLoS One* 3, e2964.

**Supplementary Table S3.** A total of 63 genes were significantly differentially expressed in *S. suis* ST2 infected versus uninfected HIBCPP cells. The significance and gene fold change were determined with the PartekGS software implementing the one-way ANOVA test. Significant DEGs with a  $\pm 2$  fold change and an uncorrected  $p$ -value  $\leq 0.05$  are presented.

| Gene Symbol  | Gene Name                                                                                              | $p$ -value | Fold Change |
|--------------|--------------------------------------------------------------------------------------------------------|------------|-------------|
| ZFP36L1      | ZFP36 ring finger protein like 1                                                                       | 0.0427     | 3.6         |
| PCK1         | Phosphoenolpyruvate carboxykinase 1                                                                    | 0.0254     | 3.3         |
| TCIM         | Transcriptional and immune response regulator                                                          | 0.0249     | 3.1         |
| LOC100996419 | uncharacterized ncRNA                                                                                  | 0.0247     | 3.0         |
| C8orf44-SGK3 | Chromosome 8 open reading frame 44 - Serum/glucocorticoid regulated kinase family member 3 readthrough | 0.0415     | 2.9         |
| HLA-F-AS1    | Major histocompatibility complex, class I, F antisense RNA 1                                           | 0.0059     | 2.7         |
| ARIH2OS      | Ariadne RBR E3 ubiquitin protein ligase 2 opposite strand                                              | 0.0420     | 2.7         |
| FSBP         | Fibrinogen silencer binding protein                                                                    | 0.0223     | 2.6         |
| FBXL8        | F-box and leucine rich repeat protein 8                                                                | 0.0137     | 2.6         |
| LIFR-AS1     | Leukemia inhibitory factor receptor antisense RNA1                                                     | 0.0373     | 2.5         |
| RASA4        | RAS p21 protein activator 4                                                                            | 0.0090     | 2.5         |
| MXI1         | MAX interactor 1, dimerization protein                                                                 | 0.0430     | 2.5         |
| LINC00887    | Long intergenic non-protein coding RNA 887                                                             | 0.0136     | 2.5         |
| MHENCRCR     | Melanoma highly expressed competing endogenous lncRNA for miR-425 and miR489                           | 0.0373     | 2.4         |
| ARL14        | ADP ribosylation factor like GTPase 14                                                                 | 0.0211     | 2.4         |
| PIK3IP1      | Phosphoinositide-3-kinase interacting protein 1                                                        | 0.0063     | 2.4         |
| LINC01431    | Long intergenic non-protein coding RNA 1431                                                            | 0.0484     | 2.3         |
| LINC02482    | Long intergenic non-protein coding RNA 2482                                                            | 0.0027     | 2.3         |
| C12orf76     | Chromosome 12 open reading frame 76                                                                    | 0.0302     | 2.3         |
| KLHL24       | Kelch like family member 24                                                                            | 0.0091     | 2.3         |
| RND1         | Rho family GTPase 1                                                                                    | 0.0282     | 2.2         |
| TCP11L2      | T-complex 11 like 2                                                                                    | 0.0372     | 2.2         |
| PNRC1        | Proline rich nuclear receptor coactivator 1                                                            | 0.0395     | 2.1         |
| PRKAR2A-AS1  | Protein kinase cAMP-dependent type II regulatory subunit alpha antisense RNA 1                         | 0.0101     | 2.1         |
| CDKN1C       | Cyclin dependent kinase inhibitor 1C                                                                   | 0.0288     | 2.0         |
| RNF39        | Ring finger protein 39                                                                                 | 0.0149     | 2.0         |
| FHOD3        | Formin homology 2 domain containing 3                                                                  | 0.0349     | 2.0         |
| ZEB1-AS1     | Zinc finger E-box binding homeobox 1 antisense RNA 1                                                   | 0.0122     | 2.0         |
| DBP          | D-box binding PAR bZIP transcription factor                                                            | 0.0052     | 2.0         |
| LOC440934    | uncharacterized ncRNA                                                                                  | 0.0230     | 2.0         |
| LENG8-AS1    | Leukocyte receptor cluster, member 8 antisense RNA 1                                                   | 0.0325     | 2.0         |
| MST1         | Macrophage stimulating 1                                                                               | 0.0073     | 2.0         |
| LCMT2        | Leucine carboxyl methyltransferase 2                                                                   | 0.0025     | -2.0        |
| SHOX2        | Short stature homeobox 2                                                                               | 0.0091     | -2.0        |
| TRIM25       | Tripartite motif containing 25                                                                         | 0.0236     | -2.0        |
| IBA57        | IBA57 homolog, iron-sulfur cluster assembly                                                            | 0.0043     | -2.0        |
| URB2         | URB2 ribosome biogenesis homolog                                                                       | 0.0177     | -2.0        |
| ZNF778       | Zinc finger protein 778                                                                                | 0.0263     | -2.0        |
| RGMB         | Repulsive guidance molecular family member b                                                           | 0.0153     | -2.0        |
| CLN8         | Transmembrane endoplasmic reticulum (ER) and ER-Golgi Intermediate Compartment protein                 | 0.0137     | -2.1        |
| CD3EAP       | CD3e molecule associated protein                                                                       | 0.0122     | -2.1        |
| NBPF12       | Neuroblastoma breakpoint family member 12                                                              | 0.0084     | -2.1        |
| SLC46A1      | Solute carrier family 46 member 1                                                                      | 0.0013     | -2.1        |
| CYB561D1     | Cytochrome b561 family member D1                                                                       | 0.0469     | -2.1        |
| EN2          | Engrailed homeobox 2                                                                                   | 0.0278     | -2.1        |
| CEBPA        | CCAAT enhancer binding protein alpha                                                                   | 0.0105     | -2.1        |
| DHRS9        | Dehydrogenase reductase 9                                                                              | 0.0379     | -2.2        |
| CHAC2        | ChaC cation transport regulator homolog 2                                                              | 0.0084     | -2.2        |
| FBXO9        | F-box protein 9                                                                                        | 0.0280     | -2.2        |
| ADAM1A       | ADAM metalloproteinase domain 1A                                                                       | 0.0321     | -2.3        |
| ZNF283       | Zinc finger protein 283                                                                                | 0.0147     | -2.3        |
| MIR22HG      | lncRNA MIR22 host gene                                                                                 | 0.0424     | -2.4        |
| LRRC26       | Leucine rich repeat containing 26                                                                      | 0.0158     | -2.4        |
| POC1B-GALNT4 | POC1 centriolar protein B - Polypeptide N-acetylgalactosaminyltransferase 4 readthrough                | 0.0159     | -2.5        |
| EIF5         | Eukaryotic translation initiation factor 4E                                                            | 0.0293     | -2.6        |
| DUSP2        | Dual specificity phosphatase 2                                                                         | 0.0146     | -2.6        |
| CDK5R1       | Cyclin dependent kinase 5 regulatory subunit 1                                                         | 0.0145     | -2.8        |
| FGF18        | Fibroblast growth factor 18                                                                            | 0.0347     | -2.8        |
| KBTBD8       | Kelch repeat and BTB domain containing 8                                                               | 0.0338     | -3.1        |

**Supplementary Table S4.** A total of 50 genes were significantly differentially expressed in *S. suis* ST2 infected versus uninfected PCPEC. The significance and gene fold change were determined with the PartekGS software implementing the one-way ANOVA test. Significant DEGs with a  $\pm 2$  fold change and an uncorrected  $p$ -value  $\leq 0.05$  are presented.

| Gene Symbol        | Gene Name                                                                           | $p$ -value | Fold Change |
|--------------------|-------------------------------------------------------------------------------------|------------|-------------|
| IL1 $\beta$        | Interleukin 1 beta                                                                  | 0.041      | 134.0       |
| TNF                | tumor necrosis factor                                                               | 0.006      | 70.7        |
| ACOD1              | aconitate decarboxylase 1                                                           | 0.000      | 52.2        |
| ENSSSCG00000032343 | uncharacterized                                                                     | 0.001      | 39.3        |
| IL1 $\alpha$       | interleukin 1 alpha                                                                 | 0.002      | 29.3        |
| CCL3L1             | Chemokine (C-C motif) ligand 3-like 1                                               | 0.006      | 27.9        |
| CXCL8              | C-X-C motif chemokine ligand 8 (aka IL8)                                            | 0.006      | 22.6        |
| AMCF-II            | alveolar macrophage-derived chemotactic factor II (aka CXCL6)                       | 0.009      | 15.1        |
| CXCL2              | chemokine (C-X-C motif) ligand 2                                                    | 0.017      | 13.8        |
| CCL2               | chemokine (C-C motif) ligand 2                                                      | 0.026      | 12.1        |
| SLAMF7             | SLAM family member 7                                                                | 0.025      | 11.4        |
| RND1               | Rho family GTPase 1                                                                 | 0.023      | 10.9        |
| ENSSSCG00000008954 | uncharacterized                                                                     | 0.006      | 10.4        |
| CCL11              | chemokine (C-C motif) ligand 11                                                     | 0.008      | 9.1         |
| VCAM1              | vascular cell adhesion molecule 1                                                   | 0.019      | 8.0         |
| PLEK               | pleckstrin                                                                          | 0.003      | 5.1         |
| DEPP1              | DEPP1 autophagy regulator                                                           | 0.009      | 5.0         |
| RELB               | avian reticuloendotheliosis viral (v-rel) oncogene related B                        | 0.005      | 4.6         |
| NFKBIZ             | nuclear factor of kappa light polypeptide gene enhancer in B cells inhibitor, zeta  | 0.041      | 4.5         |
| NFKBIA             | nuclear factor of kappa light polypeptide gene enhancer in B cells inhibitor, alpha | 0.016      | 3.9         |
| CEBPD              | CCAAT/enhancer binding protein (C/EBP), delta                                       | 0.027      | 3.2         |
| GDF15              | growth differentiation factor 15                                                    | 0.001      | 2.8         |
| IRF1               | interferon regulatory factor 1                                                      | 0.017      | 2.7         |
| MAFF               | v-maf musculoaponeurotic fibrosarcoma oncogene family, protein F (avian)            | 0.001      | 2.7         |
| TCIM               | Transcriptional and immune response regulator                                       | 0.001      | 2.7         |
| SIK1               | salt inducible kinase 1                                                             | 0.000      | 2.6         |
| CABP1              | calcium binding protein 1                                                           | 0.007      | 2.4         |
| CCL5               | chemokine (C-C motif) ligand 5                                                      | 0.031      | 2.4         |
| ICAM1              | intercellular adhesion molecule 1                                                   | 0.005      | 2.4         |
| JUNB               | jun B proto-oncogene                                                                | 0.004      | 2.4         |
| MAP3K8             | mitogen-activated protein kinase kinase kinase 8                                    | 0.015      | 2.4         |
| RSAD2              | radical S-adenosyl methionine domain containing 2                                   | 0.034      | 2.3         |
| STC2               | stanniocalcin 2                                                                     | 0.036      | 2.3         |
| PLAU               | plasminogen activator, urokinase                                                    | 0.020      | 2.3         |
| PLEKHS1            | pleckstrin homology domain containing, family S member 1                            | 0.006      | 2.3         |
| NEURL3             | neuralized E3 ubiquitin protein ligase 3                                            | 0.015      | 2.3         |
| SLCO1B3            | solute carrier organic anion transporter family member 1B3                          | 0.012      | 2.2         |
| PDE4B              | phosphodiesterase 4B, cAMP specific                                                 | 0.001      | 2.2         |
| IL6                | interleukin 6                                                                       | 0.026      | 2.2         |
| ELF3               | E74-like factor 3                                                                   | 0.036      | 2.2         |
| PFKFB3             | 6-phosphofructo-2-kinase/fructose-2,6-biphosphatase 3                               | 0.003      | 2.1         |
| SRGN               | serglycin                                                                           | 0.050      | 2.1         |
| ZC3H12A            | zinc finger CCCH type containing 12A                                                | 0.004      | 2.1         |
| FAM83D             | family with sequence similarity 83, member D                                        | 0.005      | 2.0         |
| TIFA               | TRAF-interacting protein with forkhead-associated domain                            | 0.023      | 2.0         |
| KCNK3              | potassium channel, subfamily K, member 3                                            | 0.020      | 2.0         |
| VSIG4              | V-set and immunoglobulin domain containing 4                                        | 0.017      | -2.1        |
| DLGAP5             | DLG associated protein 5                                                            | 0.046      | -2.6        |
| KNL1               | kinetochore scaffold 1                                                              | 0.029      | -2.7        |
| STRC               | stereocilin                                                                         | 0.037      | -3.0        |

**Supplementary Table S5.** A total of 30 genes were found to be significant Differentially Expressed Genes in the choroid plexus of pigs suffering from *S. suis* ST2-induced meningitis versus meningitis-free pigs. The significance and gene fold change were determined with the PartekGS software implementing the one-way ANOVA test. Significant DEGs with a  $\pm 2$  fold change and a corrected  $p$ -value  $\leq 0.05$  are presented.

| Gene Symbol        | Gene Name                                           | p-value | Fold Change |
|--------------------|-----------------------------------------------------|---------|-------------|
| INSM1              | insulinoma-associated 1                             | 0.0002  | 11.3        |
| GABRB1             | gamma-aminobutyric acid A receptor, subunit beta 1  | 0.0002  | 5.0         |
| INHBB              | inhibin beta-B                                      | 0.0003  | 5.0         |
| ENSSSCG00000000659 | uncharacterized                                     | 0.0001  | 4.9         |
| PVR                | poliovirus receptor                                 | 0.0003  | 3.8         |
| CUBN               | cubilin                                             | 0.0001  | 2.9         |
| EMP2               | epithelial membrane protein 2                       | 0.0003  | 2.7         |
| CRNN               | cornulin                                            | 0.0002  | 2.7         |
| DERL3              | Der1-like domain family, member 3                   | 0.0002  | 2.7         |
| HSP90B1            | heat shock protein 90 kDa beta member 1             | 0.0000  | 2.2         |
| GPR3               | G-protein coupled receptor 3                        | 0.0004  | 2.2         |
| GPR146             | G-protein coupled receptor 146                      | 0.0004  | 2.0         |
| ALDH3B1            | aldehyde dehydrogenase 3 family member B1           | 0.0002  | -2.0        |
| DNAAF1             | dynein, axonemal assembly factor 1                  | 0.0002  | -2.2        |
| ENSSSCG00000036652 | uncharacterized                                     | 0.0003  | -2.3        |
| HYKK               | hydroxylysine kinase 1                              | 0.0001  | -2.3        |
| MTMR8              | myotubularin related protein 8                      | 0.0003  | -2.3        |
| EIF2D              | eukaryotic translation initiation factor 2D         | 0.0002  | -2.4        |
| SYTL1              | synaptotagmin-like 1                                | 0.0000  | -2.5        |
| POLE               | polymerase (DNA directed), epsilon                  | 0.0004  | -2.5        |
| ENSSSCG00000013144 | uncharacterized                                     | 0.0000  | -2.9        |
| SORD               | sorbitol dehydrogenase                              | 0.0003  | -2.9        |
| VWA5A              | von Willebrand factor A domain containing 5A        | 0.0002  | -3.1        |
| PRDM16             | PR domain containing 16                             | 0.0002  | -3.3        |
| RBM3               | RNA binding motif protein 3                         | 0.0002  | -3.9        |
| FLRT1              | fibronectin leucine rich transmembrane protein 1    | 0.0004  | -4.8        |
| ACEA_U3            |                                                     | 0.0001  | -5.5        |
| U3                 |                                                     | 0.0001  | -5.5        |
| TYMS               | thymidylate synthase                                | 0.0002  | -6.1        |
| TIMD4              | T cell immunoglobulin and mucin domain containing 4 | 0.0002  | -6.3        |
